# Supplementary material
Source: PubMed Central journal article supplement (PMC4701045)
Supplement: NIHMS743220-supplement-Supplementary_Material.pdf [file NIHMS743220-supplement-Supplementary_Material.pdf]

Mazza, G. L., Enders, C. K., & Ruehlman, L. S. (in press). Addressing item-level missing data: A comparison of proration and full information maximum likelihood estimation. *Multivariate Behavioral Research*.

## Online Appendix A

For the first simulation study, we examined absolute bias, relative bias, and standardized bias within each design cell for seven parameters: the mean of  $X$ , the mean of  $Y$ , variances of  $X$  and  $Y$ , covariance between  $X$  and  $Y$ , correlation between  $X$  and  $Y$ , and regression coefficient. Standardized bias is reported in the manuscript; absolute bias and relative bias are reported here as supplemental material. Bias refers to the difference between the average parameter estimate across the 1000 replications within a given design cell and the corresponding population parameter. Because the categorization procedure makes it difficult to derive the population values, we generated 1000 complete data sets within each design cell, and we used the average parameter estimates from these data sets as the population parameters. Absolute bias refers to the absolute value of bias. To compute relative bias, we divided raw bias (i.e., the average parameter estimate minus the population parameter) by the population parameter. Consistent with previous research, we considered values less than 5% as negligible bias, values between 5% and 10% as moderate bias, and values greater than 10% as substantial bias (e.g., Flora & Curran, 2004; Kaplan, 1989; Curran, West, & Finch, 1996; Rhemtulla, Brosseau-Liard, & Savalei, 2012).

Values of absolute and relative bias for conditions corresponding to a 25% item-level missing data rate are reported in Tables A1 to A3; these conditions match those found in Tables 1 to 3 of the manuscript. As shown in Table A1, absolute bias ranged from 0 to 0.0363 ( $M = 0.0075$ ) and relative bias ranged from -0.0189 to 0.0292 (i.e., the average parameter

estimate differed from the population parameter by up to 2.92%) when the item means and inter-item correlations were uniform. As shown in Table A2, absolute bias ranged from 0 to 0.0410 ( $M = 0.0151$ ) and relative bias ranged from -0.1032 to 0.0018 (i.e., the average parameter estimate differed from the population parameter by up to 10.32%) when the item means were uniform but the inter-item correlations varied. As shown in Table A3, absolute bias ranged from 0.0007 to 0.1686 ( $M = 0.0517$ ) and relative bias ranged from -0.0331 to 0.1949 (i.e., the average parameter estimate differed from the population parameter by up to 19.49%) when the inter-item correlations were uniform but the item means varied. Consistent with the results reported in the manuscript, proration resulted in negligible bias when the item means and inter-item correlations were uniform but resulted in non-negligible bias when either the item means or inter-item correlations varied.

Table A1

*Simulation Study 1, Absolute Bias and Relative Bias from Proration – Uniform Item Means, Uniform Inter-Item Correlations*

| Parameter              | Items Per Scale | Sample Size | MCAR Mechanism |               | MAR Mechanism Due to External Variable |               | MAR Mechanism Due to Complete Items on the Scale |               |
|------------------------|-----------------|-------------|----------------|---------------|----------------------------------------|---------------|--------------------------------------------------|---------------|
|                        |                 |             | Absolute Bias  | Relative Bias | Absolute Bias                          | Relative Bias | Absolute Bias                                    | Relative Bias |
| Mean of <i>X</i>       | 8               | 200         | 0.0003         | -0.0001       | 0.0006                                 | -0.0001       | 0.0126                                           | 0.0031        |
|                        |                 | 500         | 0.0000         | 0.0000        | 0.0001                                 | 0.0000        | 0.0129                                           | 0.0032        |
|                        | 16              | 200         | 0.0006         | 0.0002        | 0.0002                                 | 0.0001        | 0.0067                                           | 0.0017        |
|                        |                 | 500         | 0.0001         | 0.0000        | 0.0000                                 | 0.0000        | 0.0062                                           | 0.0015        |
| Mean of <i>Y</i>       | 8               | 200         | 0.0002         | 0.0000        | 0.0001                                 | 0.0000        | 0.0129                                           | 0.0032        |
|                        |                 | 500         | 0.0001         | 0.0000        | 0.0000                                 | 0.0000        | 0.0130                                           | 0.0032        |
|                        | 16              | 200         | 0.0002         | 0.0000        | 0.0001                                 | 0.0000        | 0.0063                                           | 0.0016        |
|                        |                 | 500         | 0.0000         | 0.0000        | 0.0001                                 | 0.0000        | 0.0059                                           | 0.0015        |
| Variance of <i>X</i>   | 8               | 200         | 0.0197         | 0.0159        | 0.0216                                 | 0.0174        | 0.0350                                           | 0.0283        |
|                        |                 | 500         | 0.0196         | 0.0158        | 0.0218                                 | 0.0175        | 0.0351                                           | 0.0282        |
|                        | 16              | 200         | 0.0096         | 0.0082        | 0.0108                                 | 0.0092        | 0.0174                                           | 0.0148        |
|                        |                 | 500         | 0.0095         | 0.0080        | 0.0107                                 | 0.0090        | 0.0170                                           | 0.0144        |
| Variance of <i>Y</i>   | 8               | 200         | 0.0199         | 0.0161        | 0.0217                                 | 0.0175        | 0.0356                                           | 0.0287        |
|                        |                 | 500         | 0.0199         | 0.0160        | 0.0224                                 | 0.0180        | 0.0363                                           | 0.0292        |
|                        | 16              | 200         | 0.0088         | 0.0075        | 0.0098                                 | 0.0083        | 0.0163                                           | 0.0138        |
|                        |                 | 500         | 0.0091         | 0.0077        | 0.0102                                 | 0.0086        | 0.0161                                           | 0.0136        |
| Covariance             | 8               | 200         | 0.0008         | -0.0024       | 0.0001                                 | -0.0003       | 0.0030                                           | 0.0090        |
|                        |                 | 500         | 0.0004         | 0.0012        | 0.0004                                 | 0.0012        | 0.0039                                           | 0.0117        |
|                        | 16              | 200         | 0.0002         | 0.0006        | 0.0000                                 | 0.0000        | 0.0017                                           | 0.0051        |
|                        |                 | 500         | 0.0001         | -0.0003       | 0.0002                                 | -0.0006       | 0.0017                                           | 0.0051        |
| Correlation            | 8               | 200         | 0.0050         | -0.0186       | 0.0048                                 | -0.0178       | 0.0051                                           | -0.0189       |
|                        |                 | 500         | 0.0039         | -0.0146       | 0.0044                                 | -0.0164       | 0.0044                                           | -0.0164       |
|                        | 16              | 200         | 0.0020         | -0.0071       | 0.0024                                 | -0.0085       | 0.0026                                           | -0.0092       |
|                        |                 | 500         | 0.0023         | -0.0081       | 0.0026                                 | -0.0092       | 0.0025                                           | -0.0088       |
| Regression Coefficient | 8               | 200         | 0.0050         | -0.0185       | 0.0048                                 | -0.0178       | 0.0051                                           | -0.0189       |
|                        |                 | 500         | 0.0039         | -0.0145       | 0.0044                                 | -0.0164       | 0.0043                                           | -0.0160       |
|                        | 16              | 200         | 0.0020         | -0.0070       | 0.0025                                 | -0.0088       | 0.0026                                           | -0.0091       |
|                        |                 | 500         | 0.0022         | -0.0078       | 0.0026                                 | -0.0092       | 0.0025                                           | -0.0088       |

*Note.* The table contains values of absolute bias and relative bias for conditions with a 25% item-level missing data rate. The item means and inter-item correlations were uniform.

Table A2

*Simulation Study 1, Absolute Bias and Relative Bias from Proration – Uniform Item Means, Varied Inter-Item Correlations*

| Parameter              | Items Per Scale | Sample Size | MCAR Mechanism |                      | MAR Mechanism Due to External Variable |                      | MAR Mechanism Due to Complete Items on the Scale |                      |
|------------------------|-----------------|-------------|----------------|----------------------|----------------------------------------|----------------------|--------------------------------------------------|----------------------|
|                        |                 |             | Absolute Bias  | Relative Bias        | Absolute Bias                          | Relative Bias        | Absolute Bias                                    | Relative Bias        |
| Mean of X              | 8               | 200         | 0.0003         | -0.0001              | 0.0158                                 | -0.0039              | 0.0071                                           | 0.0018               |
|                        |                 | 500         | 0.0001         | 0.0000               | 0.0153                                 | -0.0038              | 0.0072                                           | 0.0018               |
|                        | 16              | 200         | 0.0006         | 0.0002               | 0.0146                                 | -0.0037              | 0.0026                                           | -0.0007              |
|                        |                 | 500         | 0.0000         | 0.0000               | 0.0150                                 | -0.0037              | 0.0032                                           | -0.0008              |
| Mean of Y              | 8               | 200         | 0.0002         | 0.0000               | 0.0151                                 | -0.0038              | 0.0072                                           | 0.0018               |
|                        |                 | 500         | 0.0000         | 0.0000               | 0.0150                                 | -0.0037              | 0.0072                                           | 0.0018               |
|                        | 16              | 200         | 0.0002         | 0.0000               | 0.0149                                 | -0.0037              | 0.0033                                           | -0.0008              |
|                        |                 | 500         | 0.0000         | 0.0000               | 0.0149                                 | -0.0037              | 0.0036                                           | -0.0009              |
| Variance of X          | 8               | 200         | 0.0143         | -0.0153              | 0.0208                                 | -0.0222              | 0.0089                                           | -0.0095              |
|                        |                 | 500         | 0.0147         | -0.0157              | 0.0211                                 | -0.0225              | 0.0092                                           | -0.0098              |
|                        | 16              | 200         | 0.0300         | -0.0351              | 0.0398                                 | -0.0466              | 0.0321                                           | -0.0376              |
|                        |                 | 500         | 0.0303         | -0.0353              | 0.0404                                 | -0.0470              | 0.0329                                           | -0.0383              |
| Variance of Y          | 8               | 200         | 0.0143         | -0.0153              | 0.0210                                 | -0.0224              | 0.0090                                           | -0.0096              |
|                        |                 | 500         | 0.0143         | -0.0152              | 0.0205                                 | -0.0218              | 0.0084                                           | -0.0089              |
|                        | 16              | 200         | 0.0308         | -0.0360              | 0.0410                                 | -0.0479              | 0.0333                                           | -0.0389              |
|                        |                 | 500         | 0.0306         | -0.0357              | 0.0408                                 | -0.0476              | 0.0336                                           | -0.0392              |
| Covariance             | 8               | 200         | 0.0155         | -0.0667 <sup>†</sup> | 0.0240                                 | -0.1032*             | 0.0150                                           | -0.0645 <sup>†</sup> |
|                        |                 | 500         | 0.0145         | -0.0627 <sup>†</sup> | 0.0235                                 | -0.1016*             | 0.0142                                           | -0.0614 <sup>†</sup> |
|                        | 16              | 200         | 0.0136         | -0.0586 <sup>†</sup> | 0.0235                                 | -0.1013*             | 0.0153                                           | -0.0659 <sup>†</sup> |
|                        |                 | 500         | 0.0140         | -0.0602 <sup>†</sup> | 0.0237                                 | -0.1019*             | 0.0153                                           | -0.0658 <sup>†</sup> |
| Correlation            | 8               | 200         | 0.0129         | -0.0521 <sup>†</sup> | 0.0204                                 | -0.0824 <sup>†</sup> | 0.0137                                           | -0.0553 <sup>†</sup> |
|                        |                 | 500         | 0.0118         | -0.0480              | 0.0200                                 | -0.0813 <sup>†</sup> | 0.0129                                           | -0.0524 <sup>†</sup> |
|                        | 16              | 200         | 0.0066         | -0.0244              | 0.0153                                 | -0.0565 <sup>†</sup> | 0.0078                                           | -0.0288              |
|                        |                 | 500         | 0.0069         | -0.0255              | 0.0154                                 | -0.0569 <sup>†</sup> | 0.0075                                           | -0.0277              |
| Regression Coefficient | 8               | 200         | 0.0131         | -0.0528 <sup>†</sup> | 0.0205                                 | -0.0826 <sup>†</sup> | 0.0138                                           | -0.0556 <sup>†</sup> |
|                        |                 | 500         | 0.0119         | -0.0483              | 0.0200                                 | -0.0812 <sup>†</sup> | 0.0129                                           | -0.0520 <sup>†</sup> |
|                        | 16              | 200         | 0.0067         | -0.0247              | 0.0154                                 | -0.0567 <sup>†</sup> | 0.0079                                           | -0.0291              |
|                        |                 | 500         | 0.0069         | -0.0255              | 0.0155                                 | -0.0573 <sup>†</sup> | 0.0076                                           | -0.0281              |

*Note.* The table contains values of absolute bias and relative bias for conditions with a 25% item-level missing data rate. The item means were uniform but the inter-item correlations varied. Absolute values of relative bias between .05 and .10 are denoted by a dagger (†); those greater than .10 are denoted by an asterisk (\*).

Table A3

*Simulation Study 1, Absolute Bias and Relative Bias from Proration – Varied Item Means, Uniform Inter-Item Correlations*

| Parameter              | Items Per Scale | Sample Size | MCAR Mechanism |               | MAR Mechanism Due to External Variable |                     | MAR Mechanism Due to Complete Items on the Scale |                     |
|------------------------|-----------------|-------------|----------------|---------------|----------------------------------------|---------------------|--------------------------------------------------|---------------------|
|                        |                 |             | Absolute Bias  | Relative Bias | Absolute Bias                          | Relative Bias       | Absolute Bias                                    | Relative Bias       |
| Mean of X              | 8               | 200         | 0.0568         | 0.0130        | 0.0626                                 | 0.0144              | 0.1099                                           | 0.0252              |
|                        |                 | 500         | 0.0571         | 0.0131        | 0.0628                                 | 0.0144              | 0.1100                                           | 0.0253              |
|                        | 16              | 200         | 0.0538         | 0.0124        | 0.0597                                 | 0.0137              | 0.0957                                           | 0.0220              |
|                        |                 | 500         | 0.0532         | 0.0122        | 0.0594                                 | 0.0136              | 0.0951                                           | 0.0219              |
| Mean of Y              | 8               | 200         | 0.0571         | 0.0131        | 0.0630                                 | 0.0145              | 0.1100                                           | 0.0253              |
|                        |                 | 500         | 0.0569         | 0.0131        | 0.0629                                 | 0.0145              | 0.1101                                           | 0.0253              |
|                        | 16              | 200         | 0.0536         | 0.0123        | 0.0592                                 | 0.0136              | 0.0954                                           | 0.0219              |
|                        |                 | 500         | 0.0534         | 0.0123        | 0.0594                                 | 0.0136              | 0.0951                                           | 0.0219              |
| Variance of X          | 8               | 200         | 0.0190         | 0.0157        | 0.0788                                 | 0.0650 <sup>†</sup> | 0.1681                                           | 0.1386*             |
|                        |                 | 500         | 0.0185         | 0.0152        | 0.0787                                 | 0.0647 <sup>†</sup> | 0.1678                                           | 0.1379*             |
|                        | 16              | 200         | 0.0074         | 0.0064        | 0.0647                                 | 0.0561 <sup>†</sup> | 0.1296                                           | 0.1125*             |
|                        |                 | 500         | 0.0073         | 0.0063        | 0.0649                                 | 0.0560 <sup>†</sup> | 0.1292                                           | 0.1116*             |
| Variance of Y          | 8               | 200         | 0.0187         | 0.0154        | 0.0786                                 | 0.0647 <sup>†</sup> | 0.1681                                           | 0.1383*             |
|                        |                 | 500         | 0.0186         | 0.0153        | 0.0789                                 | 0.0647 <sup>†</sup> | 0.1686                                           | 0.1383*             |
|                        | 16              | 200         | 0.0062         | 0.0054        | 0.0633                                 | 0.0549 <sup>†</sup> | 0.1282                                           | 0.1112*             |
|                        |                 | 500         | 0.0066         | 0.0057        | 0.0640                                 | 0.0554 <sup>†</sup> | 0.1287                                           | 0.1114*             |
| Covariance             | 8               | 200         | 0.0017         | -0.0052       | 0.0632                                 | 0.1931*             | 0.0329                                           | 0.1005*             |
|                        |                 | 500         | 0.0007         | -0.0021       | 0.0635                                 | 0.1949*             | 0.0338                                           | 0.1037*             |
|                        | 16              | 200         | 0.0008         | -0.0024       | 0.0604                                 | 0.1846*             | 0.0307                                           | 0.0938 <sup>†</sup> |
|                        |                 | 500         | 0.0012         | -0.0037       | 0.0603                                 | 0.1842*             | 0.0305                                           | 0.0932 <sup>†</sup> |
| Correlation            | 8               | 200         | 0.0055         | -0.0205       | 0.0324                                 | 0.1206*             | 0.0089                                           | -0.0331             |
|                        |                 | 500         | 0.0046         | -0.0172       | 0.0326                                 | 0.1220*             | 0.0081                                           | -0.0303             |
|                        | 16              | 200         | 0.0024         | -0.0085       | 0.0346                                 | 0.1221*             | 0.0045                                           | -0.0159             |
|                        |                 | 500         | 0.0027         | -0.0096       | 0.0345                                 | 0.1220*             | 0.0045                                           | -0.0159             |
| Regression Coefficient | 8               | 200         | 0.0055         | -0.0204       | 0.0325                                 | 0.1206*             | 0.0089                                           | -0.0330             |
|                        |                 | 500         | 0.0046         | -0.0172       | 0.0327                                 | 0.1222*             | 0.0079                                           | -0.0295             |
|                        | 16              | 200         | 0.0025         | -0.0088       | 0.0345                                 | 0.1215*             | 0.0047                                           | -0.0165             |
|                        |                 | 500         | 0.0027         | -0.0096       | 0.0344                                 | 0.1217*             | 0.0046                                           | -0.0163             |

*Note.* The table contains values of absolute bias and relative bias for conditions with a 25% item-level missing data rate. The inter-item correlations were uniform but the item means varied. Absolute values of relative bias between .05 and .10 are denoted by a dagger (†); those greater than .10 are denoted by an asterisk (\*).

## Online Appendix B

*MSE* ratios comparing FIML with items as auxiliary variables to scale-level FIML are reported in the manuscript. *MSE* ratios comparing FIML with items as auxiliary variables to proration are reported here as supplementary material. Recall that *MSE* equals the squared bias plus the sampling variance of the parameter estimate. The results of the first simulation study indicated that the mean and covariance structures dictate the performance of proration; proration resulted in negligible bias when the item means and inter-item correlations were uniform but resulted in non-negligible bias when either the item means or inter-item correlations varied. By contrast, FIML with items as auxiliary variables provided unbiased parameter estimates across all conditions (see the results of the second simulation study). However, we expected proration to be more efficient (i.e., provide lower sampling variance) than FIML with items as auxiliary variables because proration yields a complete data set after singly imputing each participant's missing scores with the mean of his or her observed scores. When considering the tradeoff between bias and efficiency, we expected the *MSE* ratios to favor proration when the item means and inter-item correlations were uniform but to favor FIML with items as auxiliary variables when either the item means or inter-item correlations varied.

We computed *MSE* ratios by dividing the *MSE* from proration by the *MSE* from FIML with items as auxiliary variables, such that values less than 1 favor proration and values greater than 1 favor FIML with items as auxiliary variables. *MSE* ratios for conditions corresponding to a sample size of 500 are reported in Table B1. As shown in Table B1, the *MSE* ratios ranged from 0.9000 to 1.0172 ( $M = 0.9818$ ) when the item means and inter-item correlations were uniform, from 0.9429 to 1.5000 ( $M = 0.9818$ ) when the item means were uniform but the inter-

item correlations varied, and from 1.0000 to 2.6000 ( $M = 1.5071$ ) when the inter-item correlations were uniform but the item means varied.

Table B1

*Simulation Study 2, MSE Ratios Comparing FIML with All But One Item from Each Scale as Auxiliary Variables to Proration*

| Parameter       | Items Per Scale | Item-Level Missing Data Rate | MSE Ratio                                           |                                                    |                                                    |
|-----------------|-----------------|------------------------------|-----------------------------------------------------|----------------------------------------------------|----------------------------------------------------|
|                 |                 |                              | Uniform Item Means, Uniform Inter-Item Correlations | Uniform Item Means, Varied Inter-Item Correlations | Varied Item Means, Uniform Inter-Item Correlations |
| Mean of $X$     | 8               | 5%                           | 1.0000                                              | 1.0000                                             | 1.0385                                             |
|                 |                 | 15%                          | 1.0000                                              | 0.9524                                             | 1.5000                                             |
|                 |                 | 25%                          | 0.9310                                              | 1.0000                                             | 2.3929                                             |
|                 | 16              | 5%                           | 1.0000                                              | 1.0000                                             | 1.0455                                             |
|                 |                 | 15%                          | 1.0000                                              | 1.0000                                             | 1.5000                                             |
|                 |                 | 25%                          | 0.9565                                              | 1.0000                                             | 2.5217                                             |
| Mean of $Y$     | 8               | 5%                           | 1.0000                                              | 0.9474                                             | 1.0417                                             |
|                 |                 | 15%                          | 1.0000                                              | 1.0000                                             | 1.4800                                             |
|                 |                 | 25%                          | 1.0000                                              | 1.0000                                             | 2.6000                                             |
|                 | 16              | 5%                           | 1.0000                                              | 1.0000                                             | 1.0435                                             |
|                 |                 | 15%                          | 1.0000                                              | 1.0000                                             | 1.4583                                             |
|                 |                 | 25%                          | 0.9600                                              | 1.0000                                             | 2.4000                                             |
| Variance of $X$ | 8               | 5%                           | 0.9818                                              | 0.9688                                             | 1.0588                                             |
|                 |                 | 15%                          | 0.9825                                              | 0.9429                                             | 1.4717                                             |
|                 |                 | 25%                          | 1.0000                                              | 0.9459                                             | 2.1071                                             |
|                 | 16              | 5%                           | 1.0000                                              | 1.0000                                             | 1.0732                                             |
|                 |                 | 15%                          | 1.0000                                              | 1.2000                                             | 1.4286                                             |
|                 |                 | 25%                          | 1.0000                                              | 1.5000                                             | 2.0233                                             |
| Variance of $Y$ | 8               | 5%                           | 1.0000                                              | 0.9677                                             | 1.0612                                             |
|                 |                 | 15%                          | 1.0000                                              | 0.9697                                             | 1.4706                                             |
|                 |                 | 25%                          | 1.0172                                              | 0.9429                                             | 2.1698                                             |
|                 | 16              | 5%                           | 1.0000                                              | 1.0000                                             | 1.0435                                             |
|                 |                 | 15%                          | 0.9800                                              | 1.1429                                             | 1.3913                                             |
|                 |                 | 25%                          | 1.0000                                              | 1.4643                                             | 1.9565                                             |
| Covariance      | 8               | 5%                           | 0.9714                                              | 0.9500                                             | 1.0606                                             |
|                 |                 | 15%                          | 0.9459                                              | 1.0000                                             | 1.5294                                             |
|                 |                 | 25%                          | 0.9474                                              | 1.0435                                             | 2.2286                                             |
|                 | 16              | 5%                           | 1.0000                                              | 1.0000                                             | 1.1111                                             |
|                 |                 | 15%                          | 1.0000                                              | 1.0625                                             | 1.6667                                             |
|                 |                 | 25%                          | 0.9667                                              | 1.1875                                             | 2.3929                                             |
| Correlation     | 8               | 5%                           | 1.0000                                              | 1.0000                                             | 1.0000                                             |



|             |    |     |        |        |        |
|-------------|----|-----|--------|--------|--------|
|             |    | 15% | 0.9474 | 1.0000 | 1.1579 |
|             |    | 25% | 0.9000 | 1.0952 | 1.4737 |
|             |    | 5%  | 1.0000 | 1.0000 | 1.0000 |
|             | 16 | 15% | 1.0000 | 1.0000 | 1.2941 |
|             |    | 25% | 0.9444 | 1.1111 | 1.6471 |
|             |    | 5%  | 1.0000 | 1.0000 | 1.0000 |
|             | 8  | 15% | 0.9500 | 1.0000 | 1.1500 |
|             |    | 25% | 0.9048 | 1.0455 | 1.4500 |
| Regression  |    | 5%  | 1.0000 | 1.0000 | 1.0556 |
| Coefficient | 16 | 15% | 1.0000 | 1.0526 | 1.2778 |
|             |    | 25% | 0.9474 | 1.0500 | 1.5263 |

*Note.* The table contains *MSE* ratios for conditions with a sample size of 500. We computed *MSE* ratios by dividing the *MSE* from proration by the *MSE* from FIML with items as auxiliary variables, such that values less than 1 favor proration and values greater than 1 favor FIML with items as auxiliary variables.

## References

- Curran, P. J., West, S. G., & Finch, J. F. (1996). The robustness of test statistics to nonnormality and specification error in confirmatory factor analysis. *Psychological Methods, 1*(1), 16-29.
- Flora, D. B., & Curran, P. J. (2004). An empirical evaluation of alternative methods of estimation for confirmatory factor analysis with ordinal data. *Psychological Methods, 9*(4), 466-491.
- Kaplan, D. (1989). A study of the sampling variability and  $z$ -values of parameter estimates from misspecified structural equation models. *Multivariate Behavioral Research, 24*(1), 41-57.
- Rhemtulla, M., Brosseau-Liard, P., & Savalei, V. (2012). When can categorical variables be treated as continuous? A comparison of robust continuous and categorical SEM estimation methods under suboptimal conditions. *Psychological Methods, 17*(3), 354-373.
